# Supplementary material for: Rapid detemplation of nanozeolite β: microwave-assisted Fenton-like oxidation
Source: Royal Society of Chemistry journal article supplement (doi:10.1039/c2ra00947a), 2012-01-01
Supplement: c2ra00947a.pdf [file c2ra00947a.pdf]

## Electronic Supplementary Information

### **Rapid detemplation of nanozeolite $\beta$ : microwave-assisted Fenton-like oxidation**

**Yuanyuan Hu, Yahong Zhang\* and Yi Tang**

The detailed calculation of  $H_2O_2/TEA^+$  and  $Fe^{3+}/H_2O_2$  are showed as follow:

For the as-prepared nanozeolite  $\beta$ :

$$\frac{H_2O_2(mol)}{TEA^+(mol)} = \frac{V_{H_2O_2} ml \times 1.1 g / ml \times 30\%}{\frac{34 g / mol}{150 mg \times 0.8 \times 10^{-3}}} = 11.89 V_{H_2O_2} \quad (1)$$
$$\frac{H_2O_2(mol)}{TEA^+(mol)} = \frac{V_{H_2O_2} ml \times 1.1 g / ml \times 30\%}{147 g / mol}$$

Herein, the amount of  $TEA^+$  in the solution is determined by the volume of as-prepared  $\beta$  nanozeolite solution and the mass of TEAOH in the synthesis receipts, which means that  $TEAOH(g)/Nanozeolite_{as-prepared}(g)$  is 0.8 and the mass of  $\beta$  nanozeolite added in the system is 150 mg.  $V_{H_2O_2}$  presents the addition volume of  $H_2O_2$  in the as-prepared  $\beta$  nanozeolite system.

For the washed  $\beta$  nanozeolite:

$$\frac{H_2O_2(mol)}{TEA^+(mol)} = \frac{V'_{H_2O_2} ml \times 1.1 g / ml \times 30\%}{\frac{34 g / mol}{150 mg \times 0.2 \times 10^{-3}}} = 42.06 V'_{H_2O_2}$$
$$\frac{H_2O_2(mol)}{TEA^+(mol)} = \frac{V'_{H_2O_2} ml \times 1.1 g / ml \times 30\%}{130 g / mol}$$

The mass of  $TEA^+$  in the washed nanozeolite solution was determined by the TG analysis (Fig. 2b-I). It was indicated (Fig. 2b-I) that  $TEA^+$  in the micropores of the as-prepared  $\beta$  could reach about 20 wt%, i.e.,  $TEA^+(g)/Nanozeolite_{washed}(g) = 0.2$ , and the mass of  $\beta$  nanozeolite added in the system is 150 mg.  $V'_{H_2O_2}$  presents the addition volume of  $H_2O_2$  in the washed  $\beta$  nanozeolite system.

$$\frac{Fe^{3+}(\mu mol)}{H_2O_2(mol)} = \frac{V_{Fe^{3+}} \mu L \times 0.2 mol / L}{\frac{V_{H_2O_2}(V'_{H_2O_2}) ml \times 1.1 g / ml \times 30\%}{34 g / mol}} = 20.606 \frac{V_{Fe^{3+}}}{V_{H_2O_2}(V'_{H_2O_2})}$$

$V_{Fe^{3+}}$  presents the addition volume of Fe (NO<sub>3</sub>)<sub>3</sub> of 0.2 M in the as-prepared (or washed) β nanozeolite system.

Table S1 Fe/Si ratios in Fenton-treated β with different compositions before and after acid wash step.

| Sample <sup>a</sup>                                                         | 8                    | 5                    | 9                    | 10                   |
|-----------------------------------------------------------------------------|----------------------|----------------------|----------------------|----------------------|
| Fe <sup>3+</sup> / H <sub>2</sub> O <sub>2</sub> (10 <sup>-6</sup> mol/mol) | 15.45                | 9.27                 | 4.64                 | 2.32                 |
| Fe/Si before acid wash <sup>b</sup>                                         | 2.6×10 <sup>-3</sup> | 2.1×10 <sup>-3</sup> | 1.9×10 <sup>-3</sup> | 1.5×10 <sup>-3</sup> |
| Fe/Si after acid wash <sup>b</sup>                                          | n.d. <sup>c</sup>    | n.d.                 | n.d.                 | n.d.                 |

a: the No. of sample and reaction condition are corresponding to those in Table 1. b: The Fe/Si ratios of nanozeolites were detected by EDX (Philips XL 30). c: n.d. = not detected.

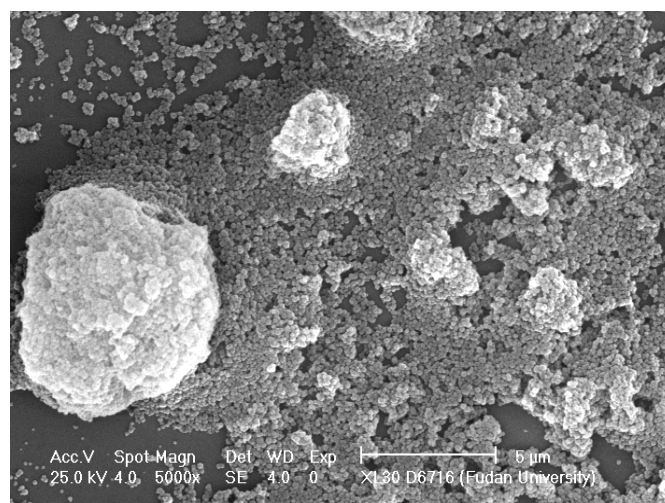

Fig. S1 SEM image of calcined β nanozeolite.

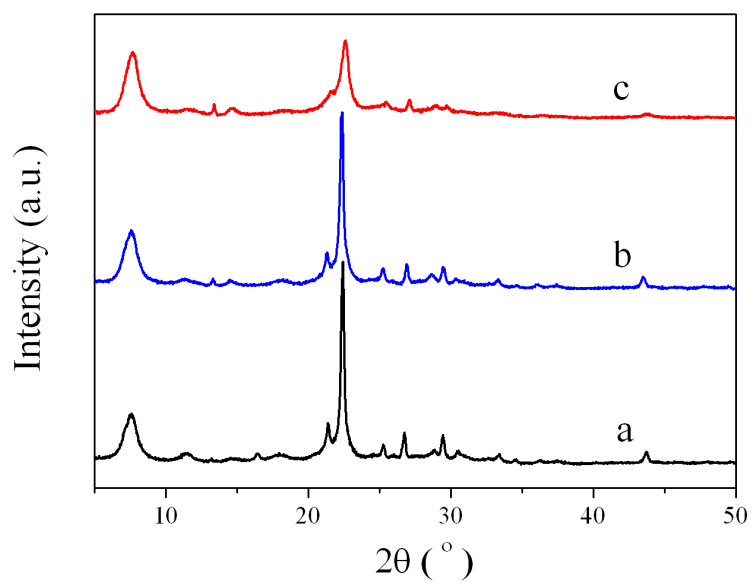

Fig. S2 XRD patterns of as-prepared  $\beta$  (a), Fenton-treated  $\beta$  (b) and calcined  $\beta$  (c).

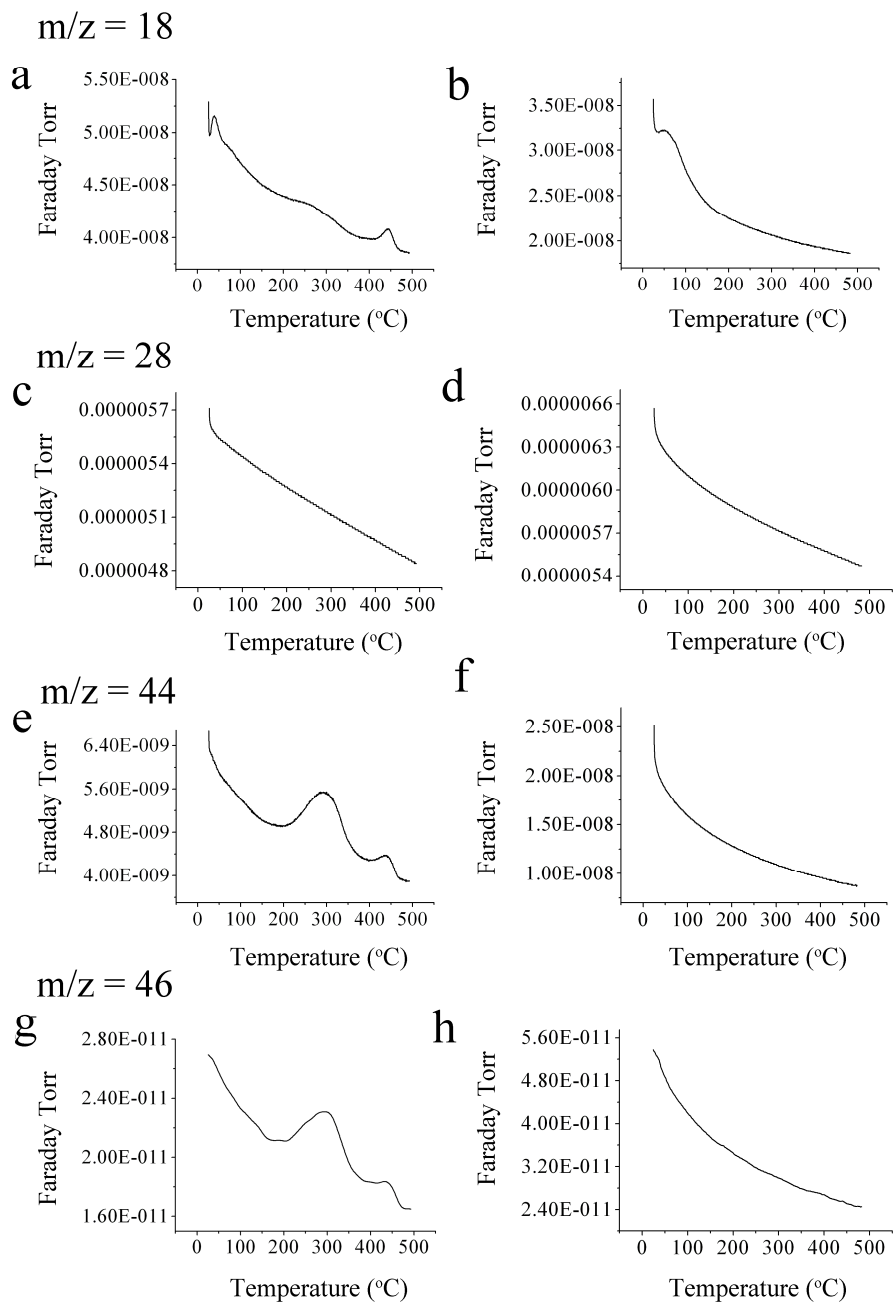

Fig. S3 MS signals of H<sub>2</sub>O (m/z = 18), CO (m/z = 28), CO<sub>2</sub> (m/z = 44) and NO<sub>2</sub> (m/z = 46) evolved when the as-prepared  $\beta$  (a, c, e, g) and Fenton-treated  $\beta$  (b, d, f, h) heated from 25 to 480 °C in air.

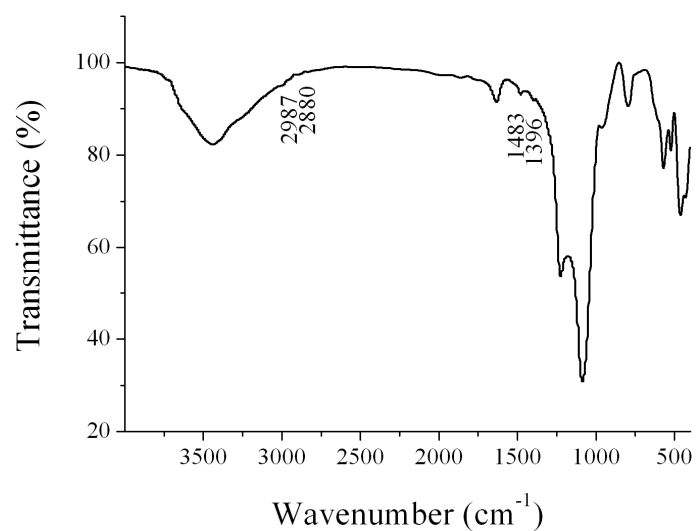

Fig. S4 FTIR spectrum of the Fenton-treated sample by an electric oven at 170 °C for 120 min. The C-H stretching (2987 and 2880 cm<sup>-1</sup>) and bending (1483 and 1396 cm<sup>-1</sup>) vibrations corresponding to SDAs are still observed.
